# Supplementary material for: Hippuristanol Reduces the Viability of Primary Effusion Lymphoma Cells both in Vitro and in Vivo
Source: MDPI journal article supplement (doi:10.3390/md11093410), 2013-09-06
Supplement: s1 [file s1]

marinedrugs-11-03410-s001.mol
  corina  12171322233D 1   1.00000     0.00000 
CORINA 3.49 0023  12.04.2013
 39 44  0  0  0  0  0  0  0  0999 V2000
   -0.0187    1.5243    0.0104 C   0  0  0  0  0  0  0  0  0  0  0  0
    0.0021   -0.0041    0.0020 C   0  0  0  0  0  0  0  0  0  0  0  0
    0.7827   -0.5187    1.2127 C   0  0  0  0  0  0  0  0  0  0  0  0
    2.2049    0.0320    1.1820 C   0  0  0  0  0  0  0  0  0  0  0  0
    2.1927    1.5653    1.2094 C   0  0  0  0  0  0  0  0  0  0  0  0
    1.4053    2.0757   -0.0002 C   0  0  0  0  0  0  0  0  0  0  0  0
    0.6147   -0.4721   -1.2003 O   0  0  0  0  0  0  0  0  0  0  0  0
    3.0051   -0.5067    2.3665 C   0  0  0  0  0  0  0  0  0  0  0  0
    4.4413    0.0099    2.3019 C   0  0  0  0  0  0  0  0  0  0  0  0
    4.4530    1.5471    2.3079 C   0  0  0  0  0  0  0  0  0  0  0  0
    3.6407    2.0474    1.1095 C   0  0  0  0  0  0  0  0  0  0  0  0
    2.6915   -0.2923    0.2544 H   0  0  0  0  0  0  0  0  0  0  0  0
    1.5373    2.0536    2.4989 C   0  0  0  0  0  0  0  0  0  0  0  0
    4.0658    1.5383    0.2162 H   0  0  0  0  0  0  0  0  0  0  0  0
    5.8783    2.0195    2.1265 C   0  0  0  0  0  0  0  0  0  0  0  0
    5.9208    3.5747    2.1245 C   0  0  0  0  0  0  0  0  0  0  0  0
    5.2022    4.0486    0.8784 C   0  0  0  0  0  0  0  0  0  0  0  0
    3.7598    3.5318    0.8509 C   0  0  0  0  0  0  0  0  0  0  0  0
    6.8673    1.6560    3.2335 C   0  0  0  0  0  0  0  0  0  0  0  0
    7.9350    2.7737    3.1921 C   0  0  0  0  0  0  0  0  0  0  0  0
    7.4367    3.7872    2.1043 C   0  0  0  0  0  0  0  0  0  0  0  0
    7.8807    3.5405    4.4113 O   0  0  0  0  0  0  0  0  0  0  0  0
    8.3854    4.8445    4.0715 C   0  0  0  0  0  0  0  0  0  0  0  0
    7.9112    5.1438    2.6492 C   0  0  0  0  0  0  0  0  0  0  0  0
    9.9076    4.8945    4.2576 C   0  0  0  0  0  0  0  0  0  0  0  0
   10.0086    5.0115    5.8080 C   0  0  0  0  0  0  0  0  0  0  0  0
    8.6856    5.6993    6.1995 C   0  0  0  0  0  0  0  0  0  0  0  0
    7.8904    5.8209    5.0043 O   0  0  0  0  0  0  0  0  0  0  0  0
    4.0424    1.8935    3.2476 H   0  0  0  0  0  0  0  0  0  0  0  0
    2.9504    4.3125    1.7236 O   0  0  0  0  0  0  0  0  0  0  0  0
    5.2689    4.1176    3.3924 C   0  0  0  0  0  0  0  0  0  0  0  0
    7.8648    3.5648    1.1167 H   0  0  0  0  0  0  0  0  0  0  0  0
    8.9290    2.3939    2.9765 H   0  0  0  0  0  0  0  0  0  0  0  0
    6.8965    6.1467    2.6379 O   0  0  0  0  0  0  0  0  0  0  0  0
    9.0741    5.6392    1.7670 C   0  0  0  0  0  0  0  0  0  0  0  0
    7.9457    4.8605    7.2423 C   0  0  0  0  0  0  0  0  0  0  0  0
    8.9762    7.0912    6.7681 C   0  0  0  0  0  0  0  0  0  0  0  0
    6.2646    1.6517    1.1719 H   0  0  0  0  0  0  0  0  0  0  0  0
   10.1257    3.6323    6.4514 C   0  0  0  0  0  0  0  0  0  0  0  0
  1  2  1  0      
  2  3  1  0      
  3  4  1  0      
  4  5  1  0      
  5  6  1  0      
  6  1  1  0      
  2  7  1  0      
  4  8  1  0      
  8  9  1  0      
  9 10  1  0      
 10 11  1  0      
 11  5  1  0      
  4 12  1  0      
  5 13  1  0      
 11 14  1  0      
 10 15  1  0      
 15 16  1  0      
 16 17  1  0      
 17 18  1  0      
 18 11  1  0      
 15 19  1  0      
 19 20  1  0      
 20 21  1  0      
 21 16  1  0      
 20 22  1  0      
 22 23  1  0      
 23 24  1  0      
 24 21  1  0      
 23 25  1  0      
 25 26  1  0      
 26 27  1  0      
 27 28  1  0      
 23 28  1  0      
 10 29  1  0      
 18 30  1  0      
 16 31  1  0      
 21 32  1  0      
 20 33  1  0      
 24 34  1  0      
 24 35  1  0      
 27 36  1  0      
 27 37  1  0      
 15 38  1  0      
 26 39  1  0      
M  END
$$$$
