# Supplementary material for: Hippuristanol Reduces the Viability of Primary Effusion Lymphoma Cells both in Vitro and in Vivo
Source: MDPI journal article supplement (doi:10.3390/md11093410), 2013-09-06
Supplement: s2 [file s2]

marinedrugs-11-03410-s001.mol
  ChemDraw12021317262D

 39 44  0  0  0  0  0  0  0  0999 V2000
   -3.5033   -1.0701    0.0000 C   0  0  0  0  0  0  0  0  0  0  0  0
   -3.5033   -1.8951    0.0000 C   0  0  0  0  0  0  0  0  0  0  0  0
   -2.7888   -2.3076    0.0000 C   0  0  0  0  0  0  0  0  0  0  0  0
   -2.0744   -1.8951    0.0000 C   0  0  0  0  0  0  0  0  0  0  0  0
   -2.0744   -1.0701    0.0000 C   0  0  0  0  0  0  0  0  0  0  0  0
   -2.7888   -0.6576    0.0000 C   0  0  0  0  0  0  0  0  0  0  0  0
   -4.2178   -2.3076    0.0000 O   0  0  0  0  0  0  0  0  0  0  0  0
   -1.3599   -2.3076    0.0000 C   0  0  0  0  0  0  0  0  0  0  0  0
   -0.6454   -1.8951    0.0000 C   0  0  0  0  0  0  0  0  0  0  0  0
   -0.6454   -1.0701    0.0000 C   0  0  0  0  0  0  0  0  0  0  0  0
   -1.3599   -0.6576    0.0000 C   0  0  0  0  0  0  0  0  0  0  0  0
   -2.0744   -2.7201    0.0000 H   0  0  0  0  0  0  0  0  0  0  0  0
   -2.0604   -0.2453    0.0000 C   0  0  0  0  0  0  0  0  0  0  0  0
   -1.3599   -1.4826    0.0000 H   0  0  0  0  0  0  0  0  0  0  0  0
    0.0691   -0.6576    0.0000 C   0  0  0  0  0  0  0  0  0  0  0  0
    0.0691    0.1674    0.0000 C   0  0  0  0  0  0  0  0  0  0  0  0
   -0.6454    0.5799    0.0000 C   0  0  0  0  0  0  0  0  0  0  0  0
   -1.3599    0.1674    0.0000 C   0  0  0  0  0  0  0  0  0  0  0  0
    0.8537   -0.9126    0.0000 C   0  0  0  0  0  0  0  0  0  0  0  0
    1.3386   -0.2451    0.0000 C   0  0  0  0  0  0  0  0  0  0  0  0
    0.8537    0.4223    0.0000 C   0  0  0  0  0  0  0  0  0  0  0  0
    2.1232    0.0098    0.0000 O   0  0  0  0  0  0  0  0  0  0  0  0
    2.1232    0.8348    0.0000 C   0  0  0  0  0  0  0  0  0  0  0  0
    1.3386    1.0897    0.0000 C   0  0  0  0  0  0  0  0  0  0  0  0
    2.9078    0.5799    0.0000 C   0  0  0  0  0  0  0  0  0  0  0  0
    3.3928    1.2473    0.0000 C   0  0  0  0  0  0  0  0  0  0  0  0
    2.9078    1.9147    0.0000 C   0  0  0  0  0  0  0  0  0  0  0  0
    2.1232    1.6598    0.0000 O   0  0  0  0  0  0  0  0  0  0  0  0
   -0.6454   -0.2451    0.0000 H   0  0  0  0  0  0  0  0  0  0  0  0
   -2.0744    0.5799    0.0000 O   0  0  0  0  0  0  0  0  0  0  0  0
   -0.2191    0.9404    0.0000 C   0  0  0  0  0  0  0  0  0  0  0  0
    0.3688    1.0897    0.0000 H   0  0  0  0  0  0  0  0  0  0  0  0
    1.8235   -0.9126    0.0000 H   0  0  0  0  0  0  0  0  0  0  0  0
    0.7631    1.6809    0.0000 O   0  0  0  0  0  0  0  0  0  0  0  0
    1.3404    1.9147    0.0000 C   0  0  0  0  0  0  0  0  0  0  0  0
    3.3609    2.6042    0.0000 C   0  0  0  0  0  0  0  0  0  0  0  0
    2.7291    2.7201    0.0000 C   0  0  0  0  0  0  0  0  0  0  0  0
    0.0820   -1.4825    0.0000 H   0  0  0  0  0  0  0  0  0  0  0  0
    4.2178    1.2473    0.0000 C   0  0  0  0  0  0  0  0  0  0  0  0
  1  2  1  0      
  2  3  1  0      
  3  4  1  0      
  4  5  1  0      
  5  6  1  0      
  6  1  1  0      
  2  7  1  6      
  4  8  1  0      
  8  9  1  0      
  9 10  1  0      
 10 11  1  0      
 11  5  1  0      
  4 12  1  6      
  5 13  1  1      
 11 14  1  6      
 10 15  1  0      
 15 16  1  0      
 16 17  1  0      
 17 18  1  0      
 18 11  1  0      
 15 19  1  0      
 19 20  1  0      
 20 21  1  0      
 21 16  1  0      
 20 22  1  0      
 22 23  1  0      
 23 24  1  0      
 24 21  1  0      
 23 25  1  6      
 25 26  1  0      
 26 27  1  0      
 27 28  1  0      
 23 28  1  1      
 10 29  1  1      
 18 30  1  1      
 16 31  1  1      
 21 32  1  6      
 20 33  1  6      
 24 34  1  1      
 24 35  1  6      
 27 36  1  0      
 27 37  1  0      
 15 38  1  6      
 26 39  1  1      
M  END
